# Supplementary material
Source: PubMed Central journal article supplement (PMC5075520)
Supplement: NIHMS803420-supplement.pdf [file NIHMS803420-supplement.pdf]

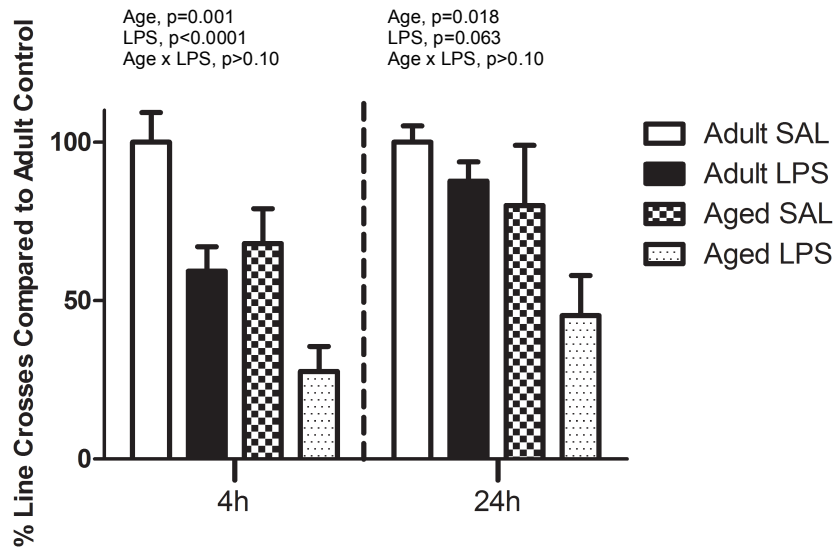

**Supplementary Figure 1. Sickness behavior in adult and aged mice after LPS.** Mice were injected i.p. with sterile saline or LPS. Locomotor activity was measured at 4 and 24 hours post-injection. Activity of adult saline-treated mice at 4 hours was used for the baseline behavior. Bars represent the mean  $\pm$  SEM (n = 9-10).
